# Supplementary material for: The IAGOS NO x Instrument – Design, Operation and First Results from Deployment aboard Passenger Aircraft
Source: Copernicus journal article supplement (doi:10.5194/amt-2017-435), 2017-12-22
Supplement: Supplementary file 1 [file amt-2017-435-supplement.pdf]

# The IAGOS NO<sub>x</sub> Instrument – Design, Operation and First Results from Deployment aboard Passenger Aircraft

Florian Berkes<sup>1</sup>, Norbert Houben<sup>1</sup>, Ulrich Bundke<sup>1</sup>, Harald Franke<sup>2</sup>, Hans-Werner Pätz<sup>1</sup>, Franz Rohrer<sup>1</sup>, Andreas Wahner<sup>1</sup>, and Andreas Petzold<sup>1</sup>

5 <sup>1</sup> Forschungszentrum Jülich, IEK-8, Jülich, Germany

<sup>2</sup> Enviscope GmbH, Frankfurt, Germany

Correspondence to: Florian Berkes (f.berkes@fz-juelich.de)

## Supplement

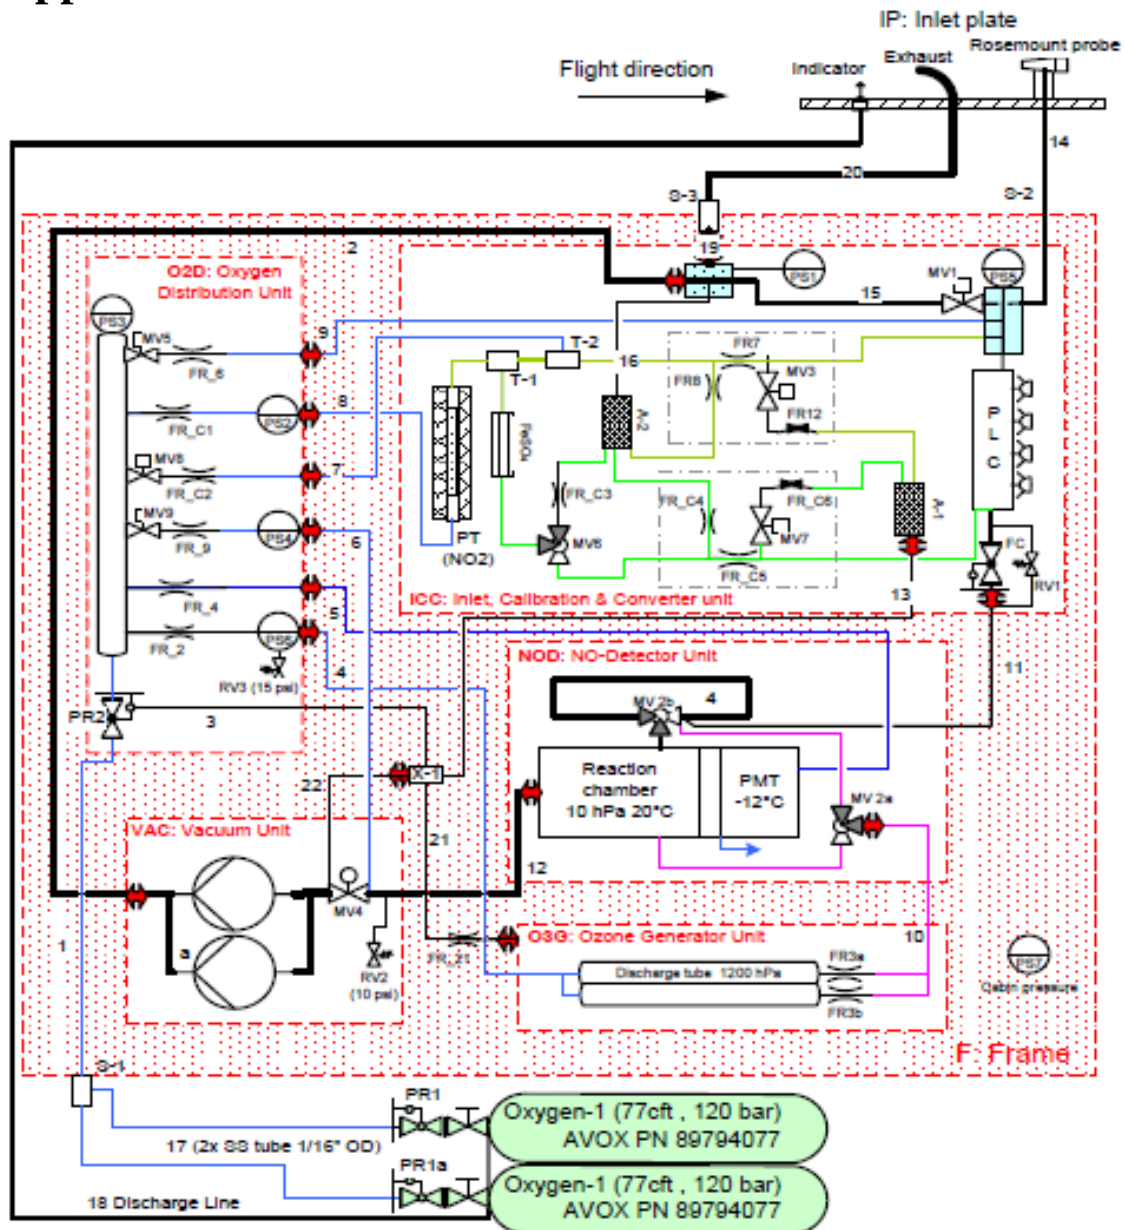

10 Figure S1: Detailed pneumatic diagram of the IAGOS NO<sub>x</sub> instrument (Revision 1), showing all pneumatic connections. A details description is available in the SOP (<https://www.iagos.org/iagos-core-instruments/package2b/>).

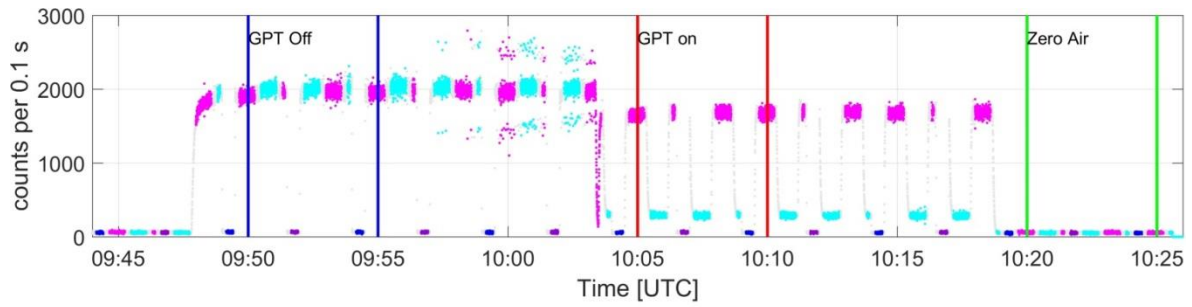

|                                |       |          |          |
|--------------------------------|-------|----------|----------|
| Date:20160928_092431           | Netto | MessMode | ZeroMode |
| File name:B201_20160928_092431 | 0     | 500      | 500      |
| External data:                 | 19400 | 20030    | 630      |
| NO Referenz:15.5 ppb           | 2385  | 2910     | 525      |
| $S_{NOD}$ :1.2516 cps/ppt      | 40    | 560      | 520      |
| $E_{PLC}$ :83.5%               | 18860 | 19500    | 640      |
| Titration:87.7 %               | 16155 | 16765    | 610      |

5 **Figure S2: Determination of instrument characteristics during an external GPT in the laboratory. GPT off: only NO is flushed through the instrument. GPT on: mixture of NO and NO<sub>2</sub>. Zero-Air: NO and NO<sub>2</sub> free gas. For each interval at least 5 minutes of measurements are taken. Measure modes are shown for NO<sub>c</sub> (pink) and for NO (light blue); the zero modes are shown for NO<sub>c</sub> (purple) and for NO (dark blue).**

10

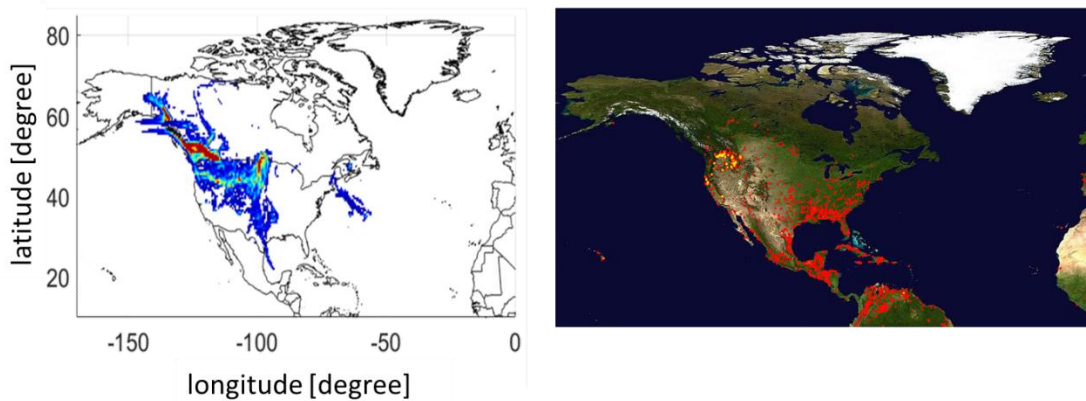

15 **Figure S3: Left: Possible contribution of surface air masses based on 4 days backward simulations using the FLEXPART model on the Plume observed at cruise altitude shown in Fig 12. FLEXPART was driven by meteorological analysis data of 1° degrees in longitude and latitude with 60 hybrid-pressure levels in the vertical from ERA-Interim. Tracers are inert, non-interacting particles and released for one hour when the first plume was observed (23 UTC). FLEXPART model output is given as the potential emission sensitivity (PES) of the particles over a particular region every hour. For this analysis the PES was time-intergraded over the analyzed period from the surface up to 500 m. Right: Fire detection map at this time period from <https://lance.modaps.eosdis.nasa.gov/cgi-bin/imagery/firemaps.cgi>.**

20

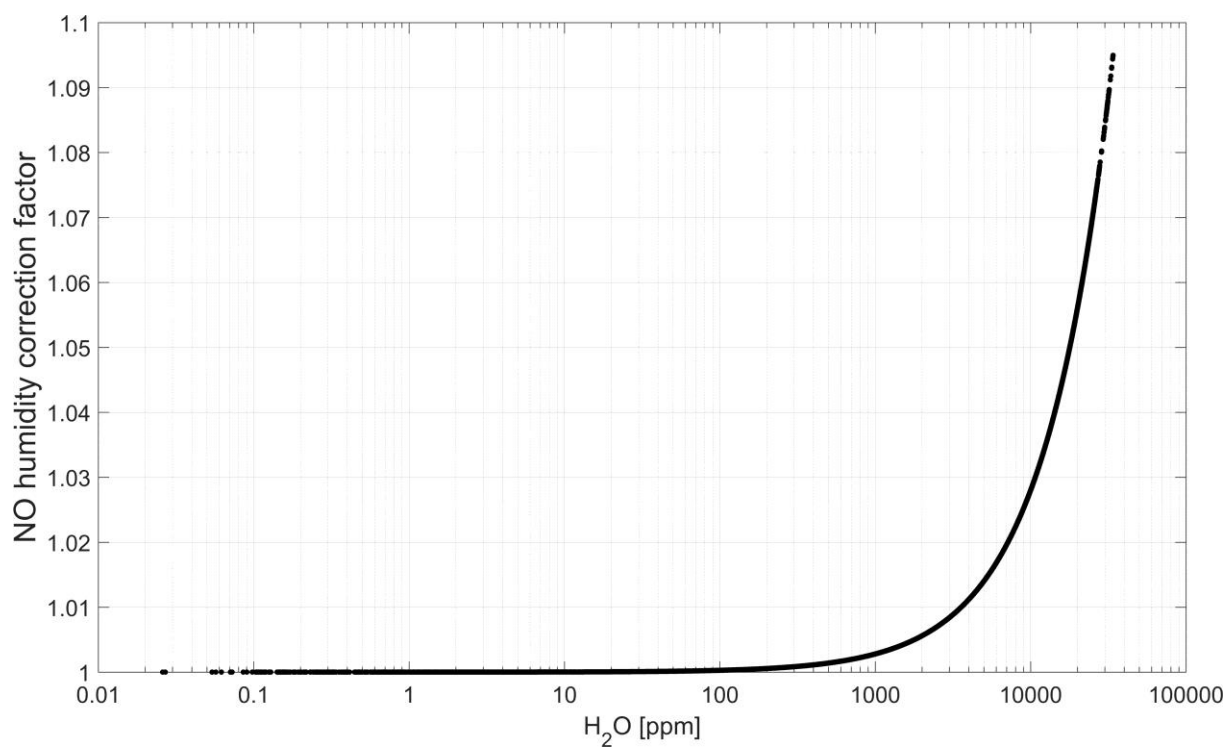

Figure S4: NO water correction factor depending on the ambient water vapor mixing ratio.
