# Supplementary material for: The IAGOS NO x Instrument – Design, Operation and First Results from Deployment aboard Passenger Aircraft
Source: Copernicus journal article supplement (doi:10.5194/amt-2017-435), 2017-12-22
Supplement: Supplementary file [file amt-2017-435-AC1-supplement.pdf]

## Reply to

In “The IAGOS NOX Instrument – Design, Operation and First Results from Deployment aboard Passenger Aircraft”, Berkes et al. describe the NOX instrument deployed on a Lufthansa aircraft and provide details about the measurement technique and limitations. The authors carefully step through the various calibration and zeroing techniques, as well as data reduction steps. The details provided will be extremely helpful to scientists looking at any IAGOS generated NOX data in the future.

Overall, the paper is scientifically solid. It would benefit from some rewriting for clarity and addressing the following issues:

**We thank the referee for her/his comments, which we address (in bold) point by point in our reply below.**

Major points:

Calibrations and corrections for vertical profiles: All calibrations are done at 250 hPa inlet pressure, but data is presented from vertical profiles. No analysis was presented justifying whether this calibration should hold at the higher pressures during the landing approach. The same holds for the instrument response characterization. The authors should either show why neither of these factors change with altitude, or should account for those changes in the error analysis and present a pressure dependent error.

**The reviewer is correct that the different flight altitudes need to be considered. However, as we stated in section 2.2.2, we don't use a constant conversion efficiency to calculate the mixing ratio of NO<sub>x</sub> and NO<sub>2</sub>. For each data point the conversion efficiency is calculated depending on the ambient pressure (see figure below). This is also the case for the ozone correction etc. To clarify the issue we added the following sentence to the manuscript (line 17-21 at page 12 of the annotated manuscript:**

**“Since the ozone correction is sensitive to the ozone mixing ratio, the residence time  $\tau$  inside the PLC is determined for each instrument for the expected pressure range from 1000 hPa to 180 hPa, which provides the correction function  $\tau(p)$  to be used in Eqs. 10 and 11 (see Fig. S5 in the supplement material). For the future generation of IAGOS NO<sub>x</sub> instruments, we plan to keep the residence time in the PLC at 3 s, independent from the inlet pressure, by using a critical nozzle.”**

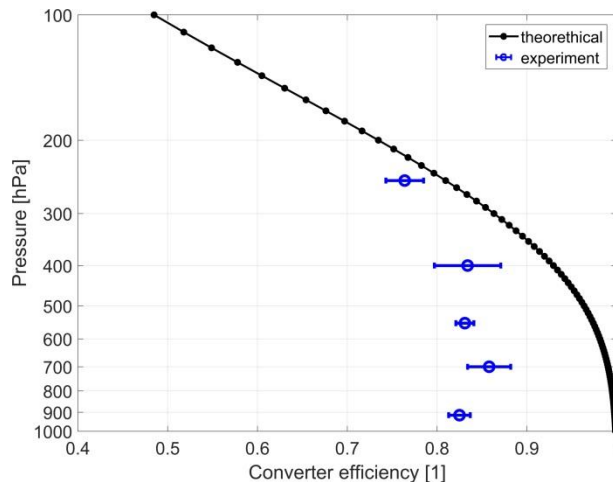

Total uncertainty: The total uncertainty does not account for uncertainty in some of the corrections applied to the data. Perhaps most importantly, the authors state on p11, L1 “the ozone correction is very sensitive to the ozone mixing ratio”, but don’t account for ozone mixing ratio in the total error analysis. If the correction is that sensitive, there needs to be more discussion about the ozone measurement. What is the error of that measurement? Also, are the instruments perfectly synchronized in time or could there be a small offset altering that correction? This is also an issue with the instrument drift during deployment. The authors show the drift is linear, but show two different linear fits. It is not clear which of those linear fits is actually used during analysis and how much it might matter if the other fit was used.

**We apologize to the reviewer that our statement leads to a misunderstanding and improved the manuscript at several places.**

**The residence time of the sampled air mass within the converter plays the most important role for the NO correction (see Fig. 7). The uncertainty of the ozone measurements is given with  $2 \text{ ppbv} \pm 2\%$  (Nédélec et al., 2015).**

**Considering this uncertainty, the ozone correction factor would change within the planetary boundary layer (900 hPa, 293K) from 1.16 to 1.17 at ozone mixing ratios of 40 or 43 ppbv, respectively. The impact of the ozone uncertainty is therefore only 1%. Therefore we believe that including the ozone uncertainty in the total uncertainty for NO is negligible. As we wrote in the manuscript, we plan to keep the residence time of the sampled air mass at 3 s for all ambient pressure conditions in a future revision of the instrument. With this, the ozone correction factor (900 hPa, 293K, 40 ppb of ozone) will reduce from 1.16 to 1.05.**

**The instrument is synchronized during flight with the main package P1. The time synchronization has been cross-checked using the ozone measurements from P1, which are also transferred every 4s to the P2 instrument.**

**The drift of the detector sensitivity is determined using the pre and post calibrations in the laboratory. The additional fit in figure 8 from the internal quality checks is just shown to justify our procedure.**

There are some writing and organization issues that make the paper difficult to read. I have noted several in the “minor points” below, but a more thorough editing would be beneficial.

Minor points:

P2,L8. “whereas” does not make sense here

**Changed to “whereas” to “also”**

P2,L12. The list is presented unclearly and the sentence should be rewritten.

**We rewrote the sentence.**

P2,L26. “Despite the progress...” should start a new paragraph

**Done**

P2,L33-38. This paragraph is unclear.

**We moved the paragraph to another position. With it we wanted to provide some information about the current state of aircraft and satellite missions and the performance of model simulations.**

P5,L36. It is unclear what the sentence beginning with “However” is actually about (e.g., conversion efficiency?).

**We rephrased this paragraph.**

P6,L4. Change to “90 cm long PFA tube with a diameter...”

**Done**

P6,L10. “trough” should be “through”

**Done**

P6,L18. O<sub>3</sub> needs subscript

**Done**

P8,L5. Change with to within

**Done**

P10. Move these correction to before the steps on P9 that use them.

**We disagree with the reviewer and think that the water - and ozone corrections needs to be explained carefully and therefore we placed them just after the outline of the data processing.**

P11,L15-16. It is not clear what the second LOD numbers, presented in parentheses, are.

**The numbers in the parentheses shall indicate that the detection limit is depending on the sensitivity of the detector. We removed them and included an additional sentence to be clearer.**

Section 4.3. Throughout this section there are percents presented, but it is not clear whether those are percent of the measured NO or percent of the interfering species (e.g., HONO).

**We improved this section.**

P13,L3. The concentrations are “too small” for what?

**Changed to “too low” to have a major impact to the NO<sub>2</sub> measurements.**

P14,L3. It reads that NO has a “variation” of 25 ppt, but it looks much larger on the graph. Do you mean a standard deviation?

**Yes we meant the standard deviation. We corrected that sentence.**

P14,L37-39. It is not clear which NO<sub>2</sub> peak is referred to here. Is this what is in the black box on the figure? Most of this paragraph is confusing.

**We rephrase this paragraph and apologies for the confusing.**

P15,L2. O<sub>3</sub> reaches over 350 ppbv in the figure presented. Not just 200 ppbv.

**We rephrase this paragraph and apologies for the confusing.**

P15,L10. Correct plum to plume.

**Done**

P15,L32. Correct averaged to average

**Done**

P15,L33. NO<sub>2</sub> is in parentheses after NO, but no NO<sub>2</sub> data are presented.

**We deleted the parentheses.**
