# Supplementary material for: The IAGOS NO x Instrument – Design, Operation and First Results from Deployment aboard Passenger Aircraft
Source: Copernicus journal article supplement (doi:10.5194/amt-2017-435), 2017-12-22
Supplement: Supplementary file [file amt-2017-435-AC2-supplement.pdf]

## Reply to

**Interactive comment on “The IAGOS NO<sub>x</sub> Instrument – Design, Operation and First Results from Deployment aboard Passenger Aircraft” by Florian Berkes et al.**

### **Anonymous Referee #2**

Received and published: 23 February 2018

The submission by Berkes et al. presents a thorough description of a NO<sub>x</sub> instrument that has flown routinely on commercial aircraft as part of a larger package with several other instruments. The measurement is based on the chemiluminescent detection of NO and NO<sub>2</sub> (after photolysis to NO). The photolytic converter for NO<sub>2</sub> is a major improvement over prior instrumentation used in such flights. The instrument is thoroughly characterized, and some representative measurement results are presented.

The paper can be published essentially as is, though some minor points should be addressed. Also, although perfectly clear, the English could be improved in spots. A few representative examples are noted below, but by no means complete.

**We thank the referee for her/his comments, which we address (in bold) point by point in our reply below.**

Minor points:

p.2, lines 4-5: please explain why production rate most favorable in the UT. Is this in regard to efficiency or total amount produced? Why not more favorable where heavily polluted? Rate is higher there.

**We have removed this sentence because it adds confusion and is not needed for our arguments.**

p.4, line 22: NOD not yet defined.

**Corrected**

p.5 line 25: Is the 18 kV AC or DC. If AC, what is frequency?

**The high-voltage transformer is operated by a pulsing DC source, running at 250 Hz. The HV transformer thus generates 18 kV at a frequency of 250 Hz. We added the frequency value to the text.**

p.7, line 32: Would be useful to cite numerical value for sensitivity.

**We included:**

**“As an example, for a detector sensitivity of 1000 cps pptv<sup>-1</sup> the uncertainty is 30 cps pptv<sup>-1</sup>. Please note, the detector sensitivity is not a constant value and it decreases during the deployment.”**

p.10, line 33: Better to say O<sub>3</sub> concentration (in cm<sup>-3</sup>) rather than mixing ratio (dimensionless).

**This is correct. We convert the mixing ratio in concentration. We changed this in the text.**

p.11, line 27: depending / change to dependent

**Changed**

p.11, line 30: An uncertainty in NO<sub>2</sub> not acknowledged is that due to the use an NO value that is not simultaneous with NO<sub>x</sub> detection. NO<sub>2</sub> error can be much larger if mixing ratios are varying, when NO is uncertain.

**The reviewer is right that we cannot provide simultaneously NO and NO<sub>x</sub> measurements with the IAGOS NO<sub>x</sub> instrument. However, during night time NO is converted to NO<sub>2</sub> which is therefore measured via NO<sub>x</sub>.**

**In Fig. 7 we show the uncertainty for NO<sub>2</sub> for day and night time, where we tried to demonstrate that the uncertainty for NO<sub>2</sub> is larger during day time, when NO is not zero.**

**At the current stage, the instrument switches between the NO and NO<sub>x</sub> mode every 30s. Each NO<sub>2</sub> data point is calculated by subtracting the median of the NO measurements before and after each NO<sub>x</sub> cycle. We cannot provide a better estimate for the “true” NO value and this makes it even more difficult to estimate an uncertainty for NO<sub>2</sub>.**

p.14, line 26: agree / change to agrees

**Changed**

P.14 line 28: “with to” / change to “by”, “by” / change to “from”

**Changed**

p.15, line 10: typo: “plum”

**Corrected**

Fig. 12, the right side of the box for the plume could probably be shifted left about 15 minutes.

**We changed the range of box.**

p.16, line 5: depending / change to dependent

**Changed**

p.16, Line 13: units of sensitivity?

**It is counts per second per pptv (cps pptv<sup>-1</sup>)**
